# Supplementary material
Source: PubMed Central journal article supplement (PMC8566323)
Supplement: NIHMS1702195-supplement-1.pdf [file NIHMS1702195-supplement-1.pdf]

## Supplementary Information

**Table S1. Sequences of DNA primer for the synthesis of dsDNA templates for *in vitro* RNA synthesis**

| Target       | Primer  | Sequence (5' to 3')                                                        |
|--------------|---------|----------------------------------------------------------------------------|
| 5'-LysCUU    | Forward | GCTTAATACGACTCACTATAGCCCGGCTAGCTCAGTCGGTAGAGCATG                           |
|              | Reverse | CCGACCCGAGTCCCATGCTCTACCGACTGAGCTA                                         |
| 5'-HisGUG    | Forward | GCTTAATACGACTCACTATAGCCGTGATCGTATAGTGGTTAGTACTCTG                          |
|              | Reverse | CCGACCCCAACGCAGAGTACTAACCACTATAACGATC                                      |
| 5'-GlyGCC    | Forward | GCTTAATACGACTCACTATAGCATTGGTGGTTCAGTGGTAGAATTCTCG                          |
|              | Reverse | CCGACCCGCAGGCGAGAATTCTACCACTGAACCA                                         |
| HDV ribozyme | Forward | TAATACGACTCACTATAGGGCATCTCCACC                                             |
|              | Reverse | GAAAAGTGGCTCTCCCTTAGCCATCCGAGTGCTCGGATGCCAGGTCGG<br>ACCGCGAGGAGGTGGAGATGCC |

**Table S2. Sequences and concentrations of TaqMan probes/primers for multiplex TaqMan RT-qPCR**

| Group  | Target    | Probe                                               | Sequence (5' to 3')                                | Concentration (nM) |
|--------|-----------|-----------------------------------------------------|----------------------------------------------------|--------------------|
| 1      | 5'-HisGUG | Forward                                             | GCTCGCCGTGATCGTATAGT                               | 200                |
|        |           | TaqMan                                              | /5HEX/TAGTACTCT/ZEN/GCGTTGGAACACTGCGTTTGC/3IABkFQ/ | 200                |
|        | 5'-GlyGCC | Forward                                             | GCATTGGTGGTTCAGTGGT                                | 200                |
|        |           | TaqMan                                              | /56-TAMN/ATTCTCGCCTGCGAACACTGCG/3IAbRQSp/          | 200                |
| 2      | Spike-in* | Forward                                             | GAGGCAAGCCCCGACGT                                  | 200                |
|        |           | TaqMan                                              | /56-FAM/GATTGTCCG/ZEN/CGAACACTGCGT/3IABkFQ/        | 200                |
|        | 5S rRNA*  | Forward                                             | TACGGCCATACCACCCTGAAC                              | 200                |
|        | TaqMan    | /56-FAM/CGGGTGCTG/ZEN/TAGGCTTTGAACACTGCGTT/3IABkFQ/ | 50                                                 |                    |
| 2      | 5'-LysCUU | Forward                                             | GCCCGGCTAGCTCAG                                    | 200                |
|        |           | TaqMan                                              | /5HEX/AGAGCATGG/ZEN/GACTCGAACACTG/3IABkFQ/         | 200                |
|        | Spike-in* | Forward                                             | GAGGCAAGCCCCGACGT                                  | 200                |
| TaqMan |           | /56-FAM/GATTGTCCG/ZEN/CGAACACTGCGT/3IABkFQ/         | 200                                                |                    |
|        | 5S rRNA*  | Forward                                             | TACGGCCATACCACCCTGAAC                              | 200                |
|        | TaqMan    | /56-FAM/CGGGTGCTG/ZEN/TAGGCTTTGAACACTGCGTT/3IABkFQ/ | 50                                                 |                    |

All synthetic primers and TaqMan probes used in this study were synthesized by Integrated DNA Technologies (the abbreviations within the sequences are according to the company). For TaqMan RT-qPCR, universal reverse primer (5'-GATCGTCCGACTGTAGAACTC-3') was used at 600 nM concentration in RT-qPCR reaction mixture. TaqMan probes contain hexachlorofluorescein (HEX), carboxytetramethylrhodamine (TAMRA), and 6-

carboxyfluorescein (FAM) as the fluorophore and ZEN/Iowa Black as the quencher. \*As a control, either spike-in RNA (for plasma RNAs) or 5S rRNA (for cellular RNAs) was quantified. Spike-in RNA and 5S rRNA cannot be quantified simultaneously.
